# Supplementary material
Source: Elsevier journal article supplement (https://www.sciencedirect.com/science/article/pii/S217357431730120X)
Supplement: mmc1 [file S217357431730120X:mmc1.docx]

Tabla Suplementaria 1. Tratamientos recibidos por los pacientes del estudio PEARL

| Pacientes | AR | AI | Total |
| --- | --- | --- | --- |
| Metotrexato | 223 (89%) | 43 (43%) | 266 (76%) |
| Antipalúdicos | 66 (26%) | 31 (31%) | 97 (28%) |
| Leflunomida | 112 (45%) | 16 (16%) | 128 (37%) |
| Sulfasalacina | 27 (11%) | 13 (13%) | 40 (11%) |
| Visitas | AR | AI | Total |
| Metotrexato | 648 (62%) | 84 (22%) | 732 (52%) |
| Antipalúdicos | 142 (14%) | 55 (15%) | 197 (14%) |
| Leflunomida | 170 (16%) | 30 (8%) | 200 (14%) |
| Sulfasalacina | 31 (3%) | 25 (7%) | 56 (4%) |

PEARL: Princesa Early Arthritis Register Longitudinal; AR: Artritis Reumatoide; AI: Artritis Indiferenciada.

Tabla Suplementaria 2. Análisis multivariable del efecto de diferentes factores sobre los niveles variables hematológicas en las visitas en las que los pacientes con artritis de inicio NO se encuentran en tratamiento con metotrexato.

| Variables | Leucocitos(x1000/mm3)  N= 592 visitas | | Hemoglobina (gr/dl)  N= 530 visitas | | Plaquetas (x1000/mm3)  N= 591 visitas | |
| --- | --- | --- | --- | --- | --- | --- |
| Coef. ± e.e. | P | Coef. ± e.e. | P | Coef. ± e.e. | P |
| Edad (años)  <45  45-65  >65 | Ref.  0'39 ± 0'21  1’19 ± 0'24 | -  0’060  <0’001 | Ref.  0'63 ± 0'11  0’39 ± 0'13 | -  <0'001  0’003 | Ref.  1’7 ± 7’0  5’5 ± 7’8 | -  0’809  0’476 |
| Sexo  Masculino  Femenino | Ref.  -0'52 ± 0'20 | -  0'011 | Ref.  -1'35 ± 0'11 | -  <0'001 | Ref.  19’4 ± 7’0 | -  0’005 |
| Tabaco  Nunca  Ex-fumador  Actual | Ref.  0'07 ± 0'24  0'64 ± 0'21 | -  0’779  0'002 | Ref.  0'11 ± 0'13  0'43 ± 0'11 | -  0'424  <0'001 | N.I. | - |
| DAS28 | N.I. | - | -0'30 ± 0'03 | <0'001 | 14’4 ± 1’9 | <0’001 |
| Corticoides (mg) | 0'08 ± 0'01 | <0'001 | N.I. | - | N.I. | - |
| MTHFR (rs1801131)  CC  CA/AA | N.I. | - | Ref.  -0'16 ± 0’11 | -  0’133 | N.I. | - |
| MTHFR (rs1801133)  CC  CT/ TT | N.I. | - | Ref.  0'04 ± 0'20 | -  0’840 | N.I. | - |
| ABCB1 (rs1045642)  TT/TC  CC | N.I. | - | N.I. | - | N.I. | - |
| ATIC (rs2372536)  CC/CG/GG | N.I. | - | N.I. | - | N.I. | - |
| FPGS (rs1544105)  AA  GG/GA | Ref.  0'35 ± 0'23 | -  0’119 | Ref.  -0'10 ± 0'10 | -  0'319 | Ref.  -21’5 ± 6’1 | -  <0'001 |

MTX: metotrexato; Ref.: referencia; N.I.: no incluido; n.s.: no significativo; IMC: índice de masa corporal; DAS28: Disease activity score de 28 articulaciones; GPT: transaminasa glutámico-pirúvica; MTHFR: Metilen-TetraHidroFolato Reductasa. ABCB1: ATP-bindingcassette B1. ATIC: Aicar Transformilasa/IMP Ciclohidrolasa. FPGS: FolilPoliGlutamato Sintetasa.

Se consideró significación estadística si p<0’0125 (ver sección de estadística para justificación)
